# Effects of global change on animal biodiversity in boreal forest landscape: an assemblage dissimilarity analysis

Ilhem Bouderbala<sup>1,2,4,\*</sup>, Guillemette Labadie<sup>2</sup>, Jean-Michel Béland<sup>3</sup>, Yan Boulanger<sup>3</sup>,  
Christian Hébert<sup>3</sup>, Patrick Desrosiers<sup>1,4,5</sup>, Antoine Allard<sup>1,4</sup>, Daniel Fortin<sup>2,4</sup>

January 31, 2022

<sup>1</sup> Département de physique, de génie physique et d'optique, Université Laval, Québec (Qc), Canada G1V 0A6

<sup>2</sup> Département de biologie, Université Laval, Québec (Qc), Canada G1V 0A6

<sup>3</sup> Centre de foresterie des Laurentides, Service canadien des forêts, Québec (Qc), Canada G1V 4C7

<sup>4</sup> Centre interdisciplinaire en modélisation mathématique de l'Université Laval, Québec (Qc), Canada G1V 0A6

<sup>5</sup> Centre de recherche CERVO, Québec (Qc), Canada G1J 2G3

## Abstract

1  
2 Despite an increasing number of studies highlighting the impacts of climate change on boreal species,  
3 the main factors that will drive changes in species assemblages remain ambiguous. We quantify two  
4 climate-induced pathways based on direct and indirect effects on species occupancy and assemblage dis-  
5 similarity under different harvest management scenarios. The direct climate effects illustrate immediate  
6 impact of climate variables while the indirect effects are reflected through the changes in land cover  
7 composition. To understand the main causes in assemblage dissimilarity, we analyze the regional and  
8 the latitudinal species assemblage dissimilarity by decomposing it into *balanced variation in species oc-  
9 cupancy and occurrence* and *occupancy and occurrence gradient*. We develop empirical models to predict  
10 the distribution of more than 100 bird and beetle species in the Côte-Nord region of Québec over the next  
11 century. Our results show the two pathways that are based on immediate and lagged climate change ef-  
12 fects are complementary and alter biodiversity, mainly caused by balanced variation in species occupancy  
13 and occurrence. At the regional scale, both effects have an impact on decreasing the number of winning  
14 species. Yet, responses are much larger in magnitude under mixed climate effects (a mixture of direct  
15 and indirect effects). Regional assemblage dissimilarity reached 0.77 and 0.69 under mixed effects versus  
16 0.09 and 0.10 under indirect effects for beetles and birds, respectively, between RCP8.5 and baseline

---

\*ilhem.bouderbala.1@ulaval.ca

17 climate scenarios when considering harvest. Therefore, inclusion of climatic variables considers aspects  
18 other than just those related to forest landscapes, such as life-cycle of animal species. Latitudinally,  
19 assemblage dissimilarity increased following the climate conditions pattern. Our analysis contributes to  
20 the understanding of how climate change alters biodiversity by reshaping community composition and  
21 highlights the importance of climate variables in biodiversity prediction.

22 **Keywords:** Biodiversity modelling, climate change, assemblage dissimilarity, assemblage dissimilarity de-  
23 composition, boreal forests, latitudinal gradient.

## 24 1 Introduction

25 Global climate warming affects the functionality of ecosystems by modifying forest composition and  
26 biomass, which in turn has repercussions for biodiversity and species assemblages (Kelly and Goul-  
27 den, 2008; Hillebrand et al., 2010; Thuiller et al., 2011; Pachauri et al., 2014; Zhang and Liang, 2014). In fact, many  
28 studies have anticipated that anthropogenic radiative forcing will alter boreal biodiversity and ecosystems  
29 (Pachauri et al., 2014; Tremblay et al., 2018; Cadieux et al., 2020). For example, global scale predictions  
30 have shown that the potential high emissions of greenhouse gases would lead mainly to negative effects on  
31 biodiversity (Pachauri et al., 2014). Instead, other results have been published anticipating an increase in  
32 biodiversity during this century, which is referred to the *the northern biodiversity paradox* (Matthews et al.,  
33 2004; Morin and Thuiller, 2009; Berteaux et al., 2010). This paradox suggests that the ecological niches of  
34 some "southerly" species would increase in size due to expansion beyond the northern periphery of their  
35 ranges (Berteaux et al., 2010).

36  
37 In Canada, temperature has increased by 1.7 °C since 1948, twice as fast as the global average (Bush  
38 and Lemmen, 2019). This increase in temperature could lead to the northward migration of thermophilous  
39 hardwood tree species to the detriment of boreal conifers, particularly mid-to-late-successional species  
40 (Duveneck et al., 2014; Boulanger et al., 2017; Boulanger and Puigdevall, 2021). Moreover, climate change is  
41 expected to directly influence wildfire activity (Boulanger and Puigdevall, 2021), which would favour pioneer  
42 and fire-adapted boreal tree species (Boulanger et al., 2017). Significant changes in species composition  
43 are expected within the transition zone between boreal and temperate biomes, where several tree species  
44 are currently reaching their thermal limits (Brice et al., 2020; Boulanger and Puigdevall, 2021). Global  
45 warming could also drive the occurrence of more extreme climatic events, including severe droughts (Kumar,  
46 2013; Masson-Delmotte et al., 2018), which are expected to reduce the productivity of several boreal

47 tree species through increasing metabolic respiration (Girardin et al., 2016). Climate-induced changes  
48 in insect outbreak regimes, notably those in spruce budworm (SBW) (*Choristoneura fumiferana*), which  
49 lead to severe defoliation and death of firs (*Abies spp.*) and spruces (*Picea spp.*), could adversely affect  
50 successional pathways within boreal forest stands (Pureswaran et al., 2015; Labadie et al., 2021).

51

52 Climate change might act on biodiversity in different ways ((Wisiz et al., 2013; Boulanger and Puigdevall,  
53 2021; Micheletti et al., 2021)). The indirect climate effects alter the vegetation and wildfire, which cause  
54 changes in habitat. Impacts could be also direct characterized by immediate effects that are exerted by  
55 climate and meteorological conditions that are not related to vegetation (Micheletti et al., 2021). The two  
56 climate-induced effects must be seen as complementary when studying their implications on ecosystem  
57 functionality. For example, the inclusion of climatic variables reflects other aspects than just those  
58 related to forest landscapes. To preserve ecosystem services, it is important to quantify the magnitude of  
59 climate-induced changes in biodiversity following both direct indirect pathways. Such a strategy would help  
60 to identify best conservation actions when these are needed. If habitat-based climate change is projected to  
61 decrease species occupancy, for example, land management actions could be adapted by targeting vegetation  
62 restoration. Species translocation actions could be adopted if direct changes are anticipated to cause a  
63 decline in species occupancy (Micheletti et al., 2021).

64

65 Future alterations in forest structure are not only influenced by climate-induced changes on stand  
66 dynamics and natural disturbances, but also by anthropogenic disturbances such as harvest activities  
67 (Boulanger et al., 2017). Climate and landuse changes may amplify changes in wildlife habitat (Bentz  
68 et al., 2010; Tremblay et al., 2018). For example, an increase in disturbance rate due to warmer conditions  
69 could favour the regeneration of warm-adapted, pioneer tree species (Brice et al., 2020; Boulanger and  
70 Puigdevall, 2021). The synergistic effects of anthropogenic disturbances and climate change could alter  
71 species assemblages, and, therefore, biodiversity. Considering the interactive and cumulative impacts of  
72 climate change and anthropogenic disturbances on forest landscapes and, hence, projections of future  
73 biodiversity are paramount. Yet, very few studies have considered such impacts on several and diversified  
74 taxa (but see Cadieux et al. (2020)).

75

76 In this work, we investigated future climate-induced variations in bird and beetle assemblages in Québec's  
77 boreal forest. We assessed effects of future climate conditions on these assemblages by comparing forest  
78 landscapes that are simulated under two anthropogenic radiative-forcing scenarios, i.e., Representative  
79 Concentration Pathway (RCP) 4.5 and RCP 8.5 (van Vuuren et al., 2011) with landscapes that are simulated

80 under average historical (baseline) climate conditions. We further assessed how forest management affects  
81 future assemblages by simulating future species occupancy under two forest management levels: no harvest  
82 activities and high harvest level. We analyze the effects of climate change in two ways: (1) indirectly,  
83 i.e., habitat-based climate change (Wisiz et al., 2013; Boulanger and Puigdevall, 2021; Micheletti et al.,  
84 2021) and (2) by combining indirect and direct effects, i.e., those stemming from climate variables per se  
85 (Thuiller et al., 2018). This distinction is made to quantify the effects of those pathways on biodiversity,  
86 which requires different conservation actions (Micheletti et al., 2021). We aimed to project how species  
87 community composition would change following anthropogenic and natural disturbances that are based  
88 upon two climate-induced pathways: immediate and lagged. We also wanted to determine the main drivers  
89 of assemblage dissimilarity following the two pathways.

90

91 We opted for a species distribution modelling (SDM) approach (Guisan and Zimmermann, 2000; Guisan  
92 and Thuiller, 2005; Peterson et al., 2011) to model the single-species occurrence probability based on extensive  
93 field surveys of beetles and birds. We analyzed the assemblage structure based on continuous occurrence  
94 probabilities (probability-based) (Guisan and Thuiller, 2005; Grenié et al., 2020) to avoid overprediction risks  
95 (Gelfand et al., 2005; Dubuis et al., 2011; Grenié et al., 2020). It has been previously demonstrated that  
96 the probability-based richness provided a better fit of the actual richness than would the threshold-based  
97 approach (Grenié et al., 2020). We computed dissimilarity measures (Baselga, 2010; Albouy et al., 2012;  
98 Baselga, 2013) between different climate scenarios over the two harvesting levels. In this context, we adapted  
99 continuous-based decomposition in the context of occurrence probabilities to detail the two components of  
100  *$\beta$ -diversity*: *balanced variation in species abundances* and *abundance gradient*, which are generalizations of  
101 turnover and nestedness (Baselga, 2013). Quantifying the main causes of change in biodiversity could be  
102 very helpful in assessing the potential underlying determinants because species replacement and nestedness,  
103 for example, are two different ways of generating assemblage dissimilarity (Baselga, 2013).

## 104 2 Material and methods

### 105 2.1 Study area and occurrence data

106 The study area is located in the Côte-Nord region of Québec, Canada ( $48^{\circ}N$  to  $53^{\circ}N$ ,  $65^{\circ}W$  to  $71^{\circ}W$ ),  
107 within an area of  $114118\text{km}^2$  (Fig. 1). The northern part of the study area belongs to the black spruce-  
108 feather moss bioclimatic domain, and is dominated by black spruce (*Picea mariana* [Mill.] BSP) and balsam  
109 fir (*Abies balsamea* [L.] Mill.). Wildfires are the major natural disturbances in areas that have yet to be

110 logged (Boucher et al., 2017). The southern part of the study area belongs to the eastern balsam fir - white  
111 birch (*Betula papyrifera* Marsha.) subdomain, mostly dominated by balsam fir and white spruce (*Picea*  
112 *glauca* [Moench] Voss) mixed with white or paper birch. Forest harvesting had been the main source of  
113 forest disturbance since the late 1990s in this latter area (Bouchard and Pothier, 2011). In Québec, logging  
114 affected around 0.8% of public forest annually (Bureau du Forestier en chef, 2010). This part of the territory  
115 also has been affected by an outbreak of the SBW that began in 2006 and which is still ongoing. Tree  
mortality began around 2015 and has subsequently increased.

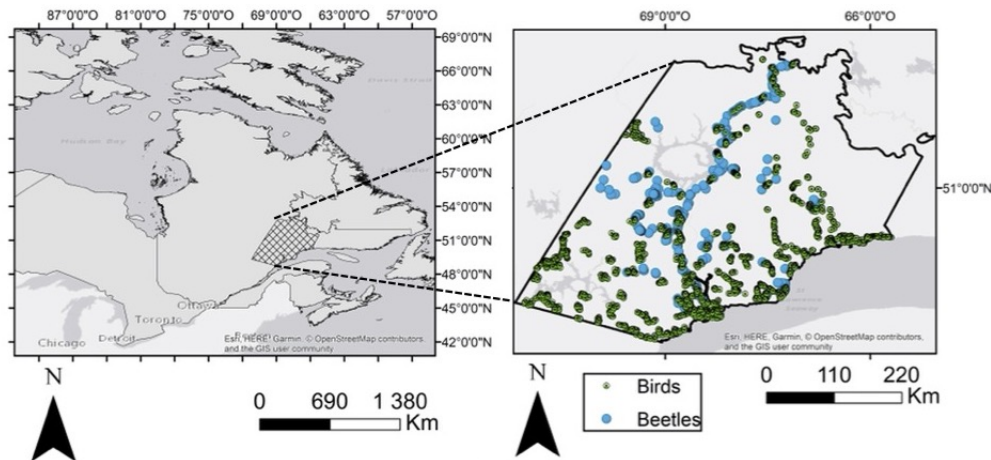

Figure 1: Study area with the presence-absence distribution of the two taxa.

116

117 We used presence-absence data that were collected between 2004 and 2018 to model species distributions.  
118 Given that we were mainly focusing on the impacts of fire and harvesting, we wanted to remove sites that  
119 were located in stands heavily damaged by the SBW outbreak (Ministère des Forêts de la Faune et des  
120 Parcs, 2018) by using a cumulative index of defoliation severity from 2007 to 2018 (Labadie et al., 2021).  
121 Annual defoliation severity was based on aerial surveys characterizing damage that was incurred by SBW  
122 since 2006 (Ministère des Forêts de la Faune et des Parcs, 2018) and was classified between 0 and 3, with  
123 3 indicating the highest level of defoliation. The cumulative severity of the outbreak was obtained by  
124 summing the annual severity in Labadie et al. (2021). Sites with cumulative severity values of 10 and above  
125 were discarded from analyses.

126

127 We used the data from the Atlas of Breeding Birds (Atlas des oiseaux nicheurs du Québec, 2018), which  
128 were based on species occurrences that were detected using unlimited distance 5-minute point counts (Bibby  
129 et al., 2000), which were collected during the breeding season from late May to mid-July, between 2010  
130 and 2018. For beetles, we merged different databases that had been collected in 2004, 2005, 2007 and 2011  
131 (Janssen et al., 2009; Légaré et al., 2011; Bichet et al., 2016). In addition, we used data from 54 sites

132 that were sampled in 2018 in the northern part of the territory, along the northeast principal road going  
133 to Labrador. The sampling protocols were characterized by one multidirectional flight-interception trap per  
134 site, sampling flying beetles, and four meshed pitfall traps per site, sampling epigeal beetles during their  
135 peak period of activity (June-August) (Janssen et al., 2009; Bichet et al., 2016). For beetles, we used species-  
136 level identifications where possible; otherwise, we standardized the identification to the genus level (around  
137 92% initial identifications were considered at the species level).

## 138 2.2 Predictor variables

139 To predict species occurrence, we used climate and land cover variables that were grouped in two classes  
140 of models: Climate-Habitat-Based (CHBMs) and Habitat-Only-Based (HOBMs). These two model classes  
141 were designed to study the climate-induced effects, as follows: CHBMs for the mixed effects; and HOBMs for  
142 the indirect climate effects. Initially, we generated 22 potential climate variables at a 250-m resolution using  
143 the BioSim platform (Régnière et al., 2017), including the annual average of temperature, precipitation and  
144 water deficit between 2004 and 2018 (see Tab. SI1 for the description of all potential predictor variables).  
145 BioSIM simulates daily maximum and minimum temperatures ( $^{\circ}\text{C}$ ), precipitation (mm), water deficit, mean  
146 daily relative humidity and wind speed by matching georeferenced sources of daily weather data to spatially  
147 georeferenced points. BioSIM uses spatial regression to adjust weather data for differences in latitude,  
148 longitude, and elevation between the sources of weather data and each field location (see (Boulanger et al.,  
149 2018a) for more details). In our case, the spatially referenced points were 15 000 points that were randomly  
150 located across the entire province of Québec, whereas weather data were daily data originating from discrete  
151 weather stations that were located within the province. We generated climate variables at a 250 m scale  
152 by spatially interpolating data from the 15 000 random points using kriging and elevation as a drifting  
153 variable. Land cover maps from the Canadian National Forest Inventory (NFI) were used to generate land  
154 cover variables based on k-nearest-neighbour interpolation at a 250-m resolution that was referenced to the  
155 year 2001 (Beaudoin et al., 2014). To estimate forest composition, we used the relative importance of tree  
156 species groups (conifer and deciduous species), treed land and tree canopy-closure maps from these NFI  
157 data to generate five natural land cover classes: closed-canopy conifer forest; open-canopy mature conifer  
158 forest; mixed forest; open area; and others (Labadie et al., 2021) (see Tab. SI2 for more details). The last  
159 category was not included in the models to avoid collinearity. For the disturbed stands (by fire or harvest),  
160 we subdivided them into three age-classes:  $[0, 10]$ ,  $]10, 20]$  and  $]20, 50]$  years. In addition, we also considered  
161 stand age and distance to the nearest burned area also as potential predictor variables. Stand age maps were  
162 based on the year 2001 (Beaudoin et al., 2014) with an update according to the registered fire and harvest

163 disturbances between 2004 and 2018. All predictor variable maps were projected into common framework  
164 (UTM) with a spatial resolution of 231 m. Furthermore, it was mentioned in Bichet et al. (2016) and Zhao  
165 et al. (2013) that the influence of the landscape varied between 400 m for beetles to 1000 m for birds.  
166 Consequently, we used a matrix of 21 pixels centred on the focal pixel (i.e., an approximate circle of 577.5 m  
167 radius) to calculate frequencies of the land cover (see Tab. SI1 for a description of the 10 land cover variables  
168 that were used in the study).

## 169 2.3 The modelling strategy

170 We used two classes of models, i.e., Habitat-Only-Based models (HOBMs) and Climate-Habitat-Based models  
171 (CHBMs), to study indirect climate effects and mixed climate effects, respectively (see filled arrows in Fig.  
172 2). We divided our modelling strategy into five steps (see Fig. 3). The modelling procedure that is described  
173 here was repeated for the two model classes (CHBMs and HOBMs) according to potential predictor variables  
174 under each class. We standardized the variables to facilitate model convergence (MacKenzie et al., 2017)  
175 prior to model calibration that was based on the corresponding database. Steps 2 and 3 correspond to a  
176 cross-validation loop, in which we split the date into 10 folds of relatively equal size, so at each step, 9 folds  
177 were used for training and the one remaining fold was for testing.

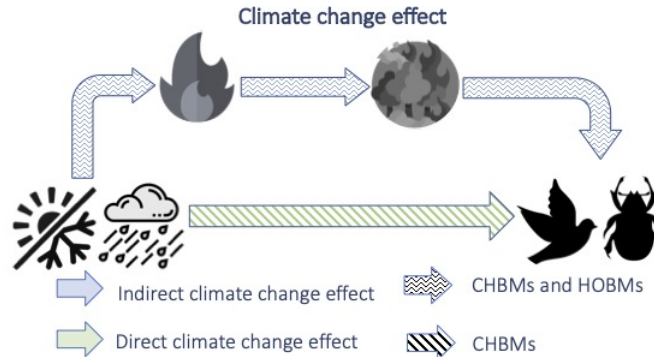

Figure 2: Framework used for the study. The indirect effects were generated through the change in forest composition and the direct effects included the immediate climate effects of temperature, precipitation and water deficit. Abbreviations: Climate-Habitat-Based Models (CHBMs), Habitat-Only-Based Models (HOBMs).

### 178 2.3.1 Step 1: Data pre-processing

179 We used the following procedure for preparing the two databases: (1) all raster files were aligned to the same  
180 extent and resolution (Elith et al., 2020); (2) we removed all the sites that were strongly impacted by the  
181 spruce budworm outbreak; and (3) we included only the more common species, with a minimum record of  
182 1% and 5% presence among sites for birds and beetles, respectively.



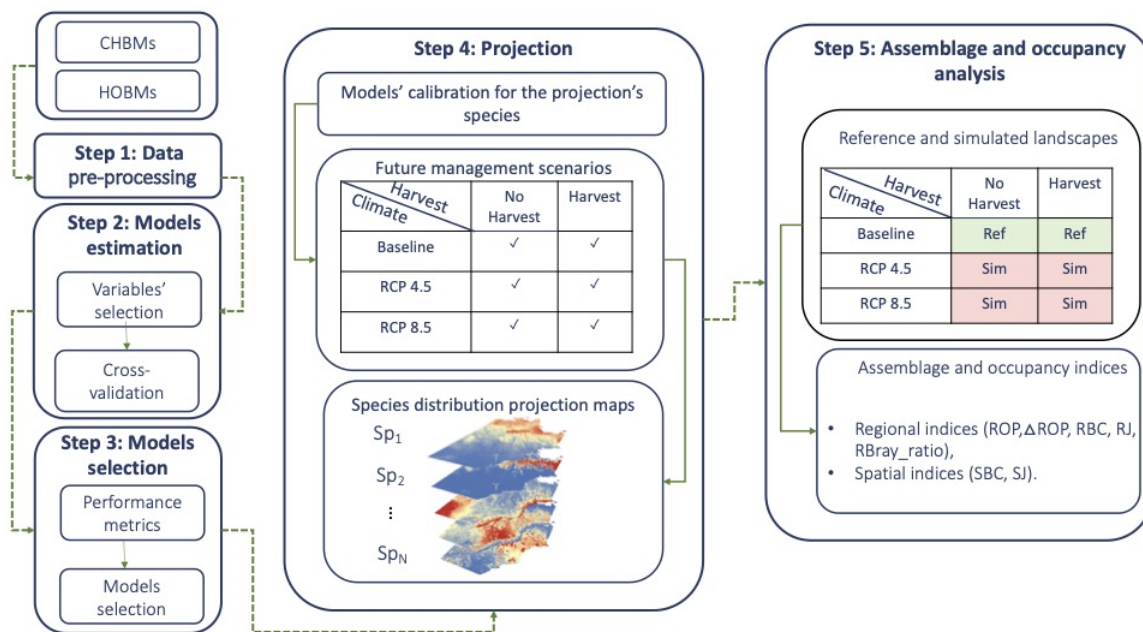

Figure 3: The modelling strategy.

### 183 2.3.2 Step 2: Model estimation

184 **Selection of variables** First, we removed the highly correlated variables, based on pairwise Pearson  
 185 correlation coefficient ( $r$ ), and kept the 5 most important predictor variables (Zurell et al., 2020). To do so,  
 186 we fitted a univariate Generalized linear model (GLM) with linear and quadratic terms for each variable;  
 187 we ranked the predictors according to their importance, using the Akaike information criterion (AIC); and  
 188 removed the highly correlated variables ( $|r| > 0.60$ ). To reduce the separation in the regressions, we removed  
 189 any predictor with a standard deviation value greater than 50 through a stepwise procedure.

190 **Cross-validation inference and computation of the occurrence probabilities** We started with a  
 191 generalized linear mixed model (GLMM) (package 'lme4', (Bates et al., 2015)) with a random intercept to  
 192 account for differences between sampling years. We developed six and three full potential models differing  
 193 only in the fixed effects for CHBMs and HOBMs model classes, respectively (see Tab. SI3). We used  
 194 interaction terms between the best temperature variable (where the AIC criterion of the corresponding  
 195 univariate regression is the lowest among all selected temperature variables) with distance to the nearest  
 196 burned stand and with stand age variables to include the effect of latitudinal variation.

197

198 The best models were selected based on each full-model under 10-fold cross-validation by minimizing the  
 199 AIC criterion (package 'MuMIn', (Barton, 2015)) under the following conditions: (1) limiting the number of



200 terms in the model between 1 and  $\lceil \min(N_{Pre}, N_{Abs}) \rceil / 5$  without counting the intercept by specifying 1 in  
201 5 rule, where  $N_{Pre}$  and  $N_{Abs}$  represented the number of respective presence and absence records, to avoid  
202 overparameterized models; and (2) respecting the principle of marginality when the interaction terms were  
203 included in the model. For each species and for each test dataset, we calculated the occurrence probabilities  
204 matrix for the calibrated models. In total, we retained six models for CHBMs and three for the HOBMs.

### 205 2.3.3 Step 3: Models selection

206 **Computation of the performance metrics** Once the occurrence probabilities were computed for the  
207 complete dataset for each species, we calculated the following performance metrics: (1) specificity; (2) sensi-  
208 tivity; (3) the area under the curve *AUC*; and (4) the true skill statistic *TSS* (Araújo et al., 2005; Allouche  
209 et al., 2006). The package ‘AUC’ (Ballings and Van den Poel, 2013) was used to calculate the Receiver op-  
210 erating characteristic and the AUC; we used the package ‘PresenceAbsence’ (Freeman and Freeman, 2012)  
211 for the other performance metrics.

212 **Models selection** Species were excluded if no model yielded  $AUC \geq 0.7$  (Araújo et al., 2005; Hosmer  
213 et al., 2013). For the selected species, we used the model with the highest AUC for projections.

### 214 2.3.4 Step 4: Projection

215 We estimated the parameters of the final model for the selected species based on the full dataset using  
216 the same procedure that was described for cross-validation. We subsequently used the simulated predictor  
217 variable maps for the six study scenarios and computed the occurrence probability maps.

### 218 2.3.5 Step 5: Assemblage and occupancy analysis

219 We used the following indices to compare species assemblages between scenarios:

220 **The regional occupancy probability (ROP):** ROP was calculated as the regional average of the  
221 occurrence probabilities for the study area (Bichet et al., 2016). We also used the percentage of change in  
222 ROP between the reference (*Ref*) and the simulated (*Sim*) scenarios (see step 5 in Fig. 3 for the definitions  
223 of *Ref* and *Sim* scenarios):  $\Delta \overline{ROP}_{Sim,Ref} = \left( \frac{\overline{ROP}_{Sim} - \overline{ROP}_{Ref}}{\overline{ROP}_{Ref}} \right) \times 100$ , where  $\overline{ROP}_s$  represented the  
224 average of the ROP over all species under the scenario *s* given by:

$$\begin{cases} \overline{ROP}_s = \frac{1}{N_{species}} = \sum_{i=1}^{N_{species}} ROP_{i,s} \\ ROP_{i,s} = \frac{1}{N_{pixel}} = \sum_{j=1}^{N_{pixel}} P_{s,i,j} \end{cases} \quad (1)$$

225 where  $N_{species}$ ,  $N_{pixel}$  and  $P_{s,i,j}$  represented respectively the species number, the number of pixels in the  
 226 study area and the occurrence probability of the species  $i$  for the scenario  $s$  at the cell  $j$ .

227 **Dissimilarity measures:** Jaccard Index of Dissimilarity was used to assess climate change effects on  
 228 species assemblage (Baselga, 2010, 2013; Legendre, 2014; Bichet et al., 2016; Barton et al., 2016; Belliard  
 229 et al., 2018; Scherrer et al., 2020). We computed two different Jaccard indices, both based on Bray-Curtis  
 230 dissimilarity measure, regional ( $RJ$ ) and spatial ( $SJ$ ) Jaccard indices computed as follows:

$$\begin{cases} RBC_{Sim,Ref} = \sum_{i=1}^{N_{species}} \frac{|ROP_{Sim,i} - ROP_{Ref,i}|}{\sum_{i=1}^{N_{species}} (ROP_{Sim,i} + ROP_{Ref,i})} \\ SBC_{Sim,Ref,j} = \sum_{i=1}^{N_{species}} \frac{|P_{Sim,i,j} - P_{Ref,i,j}|}{\sum_{i=1}^{N_{species}} (P_{Sim,i,j} + P_{Ref,i,j})} \\ RJ_{Sim,Ref} = \frac{2RBC_{Sim,Ref}}{1+RBC_{Sim,Ref}}, SJ_{Sim,Ref,j} = \frac{2SBC_{Sim,Ref,j}}{1+SBC_{Sim,Ref,j}} \end{cases} \quad (2)$$

231  $RBC_{Sim,Ref}$  and  $SBC_{Sim,Ref,j}$  represented respectively the regional Bray-Curtis dissimilarity between the  
 232 scenarios  $Sim$  and  $Ref$ , the spatial Bray-Curtis at the cell  $j$  selected randomly.

233

234 From Fig. 4, we compared the performance of the Jaccard index that was based on our continuous  
 235 output ( $SJ_{OP}$ ) and the traditional Jaccard that was based based on the presence-absence transformation  
 236 ( $SJ_{Incidence}$ ). From the simulation results, the  $SJ_{OP}$  yield results that were close to  $SJ_{Incidence}$  and per-  
 237 formance increased with the number of species that were analyzed (see Fig. 4I). Furthermore, we added  
 238 two situations with weaker binarization (Bad and Medium cases in Fig. 4) to illustrate that a gap can be  
 239 generated between the two indices that is due mainly to binarization error.

240 **Beta ratio:** We separated the Bray-Curtis dissimilarity index into two additive components: (1) the  
 241 occurrence gradient ( $BC_{grad}$ ); and (2) balanced variation in species occurrence ( $BC_{bal}$ ) to quantify the  
 242 main drivers in assemblage dissimilarity. We used these notations instead of the abundance gradient and  
 243 balanced variation in species abundance (Baselga, 2013) because we worked with occurrence and occupancy  
 244 probabilities. We presented a detailed explanation of each component, as follows:

- 245 • If  $BC_{grad_{Sim,Ref}} = 0$  ( $BC_{Sim,Ref} = BC_{bal_{Sim,Ref}}$ ), means a **total** absence of differences in  
 246 occurrences between the two scenarios. Furthermore, if  $BC_{Sim,Ref} \simeq 0$ , the assemblage structure  
 247 remained almost the same. If  $BC_{Sim,Ref} \simeq 1$ , the occurrence of species in one scenario was almost  
 248 perfectly balanced by the occurrence of species in the other scenario.
- 249 • If  $BC_{bal_{Sim,Ref}} = 0$  ( $BC_{Sim,Ref} = BC_{grad_{Sim,Ref}}$ ), this means that all species occurrence  
 250 changes from one scenario to the next were in **the same direction**. If  $BC_{Sim,Ref} \simeq 1$ , this im-

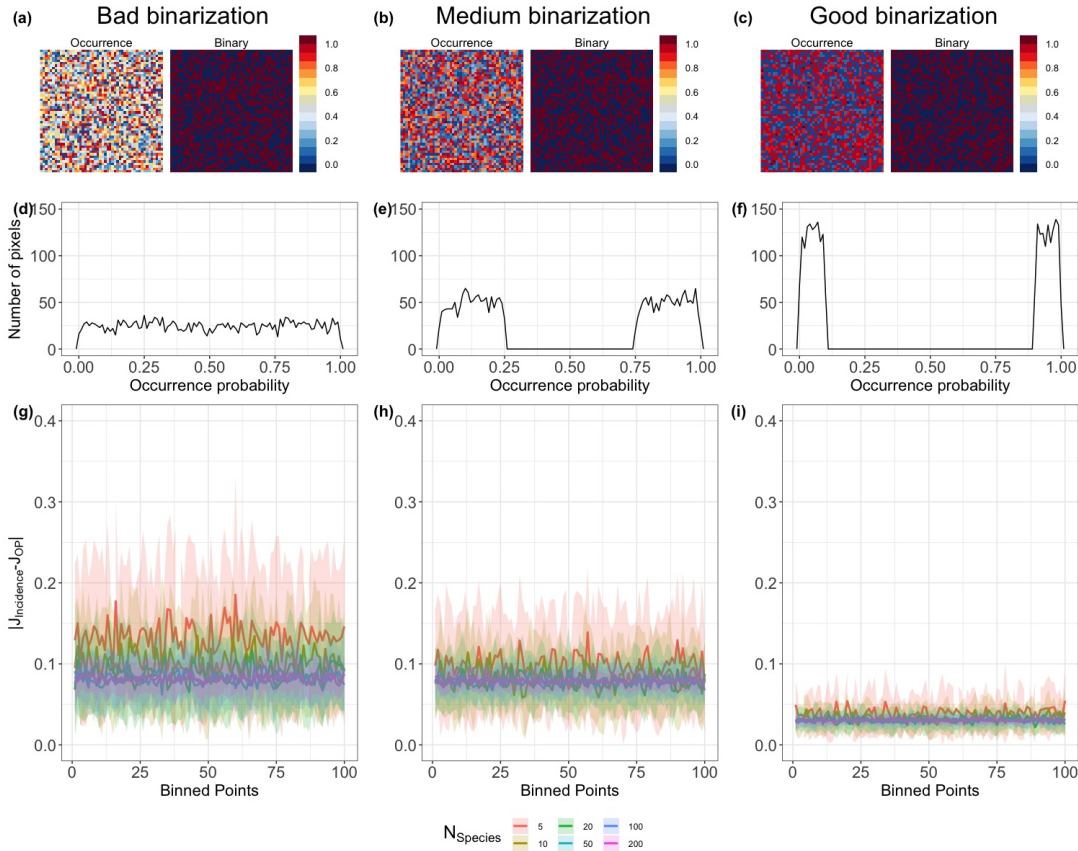

Figure 4: A generic Incidence-based VS Occurrence Probabilities Jaccard dissimilarity. The three levels of binarization concerned the rank choice of the occurrence probabilities that were simulated from a mixture of uniform distributions under constraints. **A-B-C** represented the three simulated occurrence probabilities and the corresponding binarized maps with 0.5 threshold for one species and under one scenario. **D-E-F** showed the frequency of the occurrence probability at the different pixels. **G-H-I** concerned the absolute difference between Jaccard dissimilarity based on the binarized data and the continuous version by varying the number of species.

251 plies that the difference in occurrence between the two scenarios is too large and in the same direction  
 252 in almost all species.

253 To measure the fraction of each component of Bray-Curtis dissimilarity, we used the  $BC\_ratio$  given by  
 254  $BC\_ratio_{Sim,Ref} = \frac{BC\_grad_{Sim,Ref}}{BC_{Sim,Ref}}$ . If  $BC\_ratio > 0.5$ , the assisted community change was caused  
 255 mostly by the occurrence gradient whereas a value smaller than 0.5 indicated a dominance of balanced  
 256 change in occurrence in the assemblage dissimilarity (Albouy et al., 2012). We used the package 'betapart'  
 257 (Baselga and Orme, 2012) for the assemblage analysis.

258

259 The  $BC\_ratio$  and its components were illustrated by using occurrence probabilities. The same formal-  
 260 ism was adapted regionally through the regional occupancy probabilities.

## 2.4 The study climate and forest management scenarios

We obtained future climate projections from the Canadian Earth System Model version 2 (CanESM2) for RCP 4.5 and RCP 8.5 for the period 2071-2100 and were further downscaled to a 10-km resolution using ANUSPLIN (McKenney et al., 2013). Future monthly normals at each random point that was previously used to assess baseline climate were directly assessed from changes that were observed between the 1981-2010 period and future projections in the 10-km cell in which the random point was located. Daily time series were stochastically generated for each random point from these future monthly normals using BioSIM. Future climate variables at each random point were calculated by averaging these daily values from 30 BioSIM simulations (Boulanger et al., 2018a). Climate scenarios varied depending upon the mean annual temperature that was expected to increase between 3 °C (RCP4.5) and 7.5 °C (RCP8.5) throughout the southern boreal region by 2100 (compared with 2000, see Fig. 5), while average precipitation was projected to increase between 7% and 10% regionally with relatively small differences among scenarios (Boulanger et al., 2018b; Boulanger and Puigdevall, 2021), see Fig. 5).

The forest landscapes were simulated using the spatially explicit raster-based forest landscape model LANDIS-II (Scheller and Mladenoff, 2004), which simulates stand- and landscape-scale processes, including forest succession, seed dispersal and natural (wildfires and spruce budworm outbreaks) and anthropogenic (harvest) disturbances. This model has been extensively used in Québec over the last decade and has been thoroughly validated under various forest conditions (Boulanger et al., 2017; Taylor et al., 2017; Tremblay et al., 2018; Boulanger and Puigdevall, 2021). Forest landscapes were initialized for 2000 conditions using the NFI attribute maps (Beaudoin et al., 2014) and provincial sample plots. Tree growth and regeneration as well as wildfires were climate-sensitive in simulations. We simulated two levels of harvesting scenarios according to a gradient of harvesting pressure, from no harvesting to high intensity harvesting, similar to current management practices in Québec (harvest applied to 8% of the harvestable upland area per 10 years). The Biomass Harvest extension was used to simulate forest harvests. Only stands that contained tree cohorts that were greater than 60-years-old were allowed to be harvested. Mean harvested patch size varied between 40 km<sup>2</sup> and 150 km<sup>2</sup>. Harvest rates were held constant throughout the simulations unless sufficient numbers of stands did not qualify for harvest. In this latter harvesting continued proceed until stands were no longer available. Simulations were performed from 2000 to 2100 using a 10-yr time step. Climate sensitive parameters for simulations that were performed under RCP 4.5 and RCP 8.5 were set to change in 2011-2020, 2041-2050 and 2071-2080. Forest succession, wildfire, SBW outbreaks and harvesting were simulated using Biomass Succession v5.0, Base Fire v4.0, BDA v4.0 and the Biomass Harvest v5.0

293 extensions, respectively. Many more details regarding LANDIS-II simulations that were performed in this  
294 study can be found in (Labadie et al., 2022) as well as in (Boulanger et al., 2017) and (Tremblay et al.,  
2018).

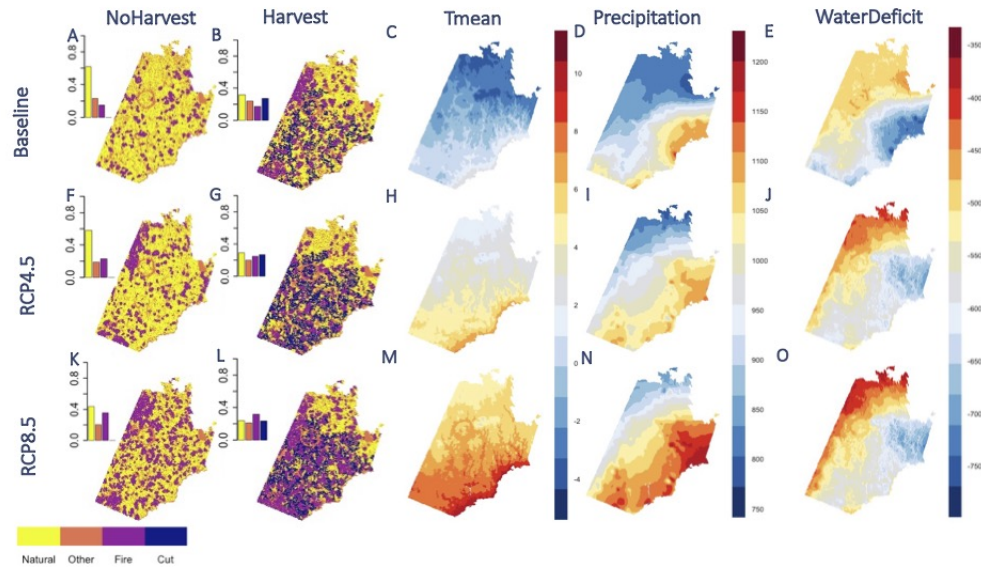

Figure 5: The distribution of the land cover and three climate variables under the simulated management scenarios in 2100. **A-B.**, **F-G.** and **K-L.** represented the distribution of land cover over the six study scenarios that were classified into four large cover classes: *Natural*, which included conifer dense, conifer open, mixed wood and open habitat; *Fire* and *Cut* for the land cover disturbed by fire and Harvest; and *Others* for the rest. The barplots represented the frequency of each class in the map. **D-F.**, **J-L.** and **P-R.** represented the distribution of mean temperature, precipitation, and water deficit for the three climate scenarios **Baseline**, **RCP4.5** and **RCP8.5**, respectively.

295

### 296 3 Results

297 Of 231 candidate species of birds and beetles, 127 and 108 species were selected for projection (with  $AUC \geq$   
298 0.7) for CHBMs and HOBMs respectively with average of AUC between 0.76 ( $\pm 0.07$ ) and 0.79 ( $\pm 0.08$ ),  
299 and TSS between 0.43 ( $\pm 0.13$ ) and 0.53 ( $\pm 0.16$ ) (mean ( $\pm$  SD)). For bird species, *stand age* was the most  
300 frequently selected predictor variable with 43.9% and 71% of selection in CHBMs and HOBMs, respectively,  
301 (see Fig. 6). For beetle species, mean temperature of the warmest month (*WarmMTmean*) and *stand age*  
302 were the most frequently selected variables under CHBMs and HOBMs with 33.7% and 40.3% of selection,  
303 respectively (see Fig. 6).



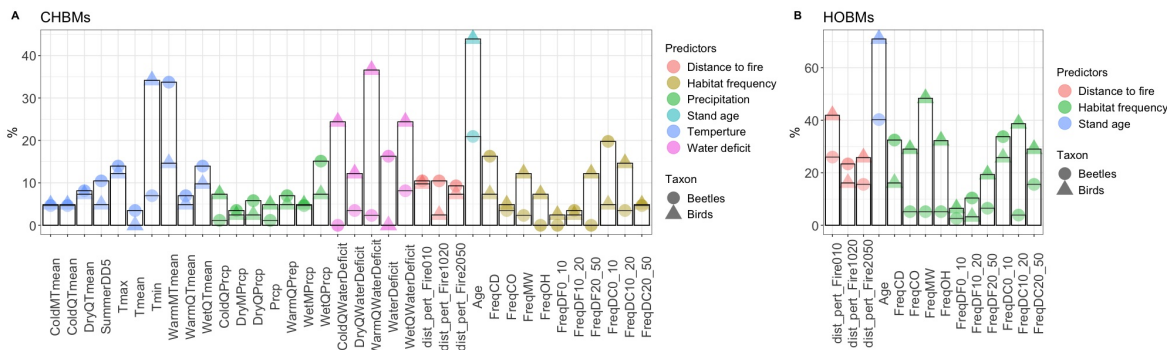

Figure 6: Percentage of the predictor variables that were included in the species regressions for the two taxa (See Tab. S11 for the variable descriptions), **A.** for Climate-Habitat-Based Models (CHBMs) and **B.** for Habitat-Only-Based-Models (HOBMs). Land cover abbreviations: Conifer Dense (CD), Conifer Open (CO), Mixed Wood (MW), Open Habitat (OH), Disturbance by Fire (DF), and Disturbance by Cut (DC).

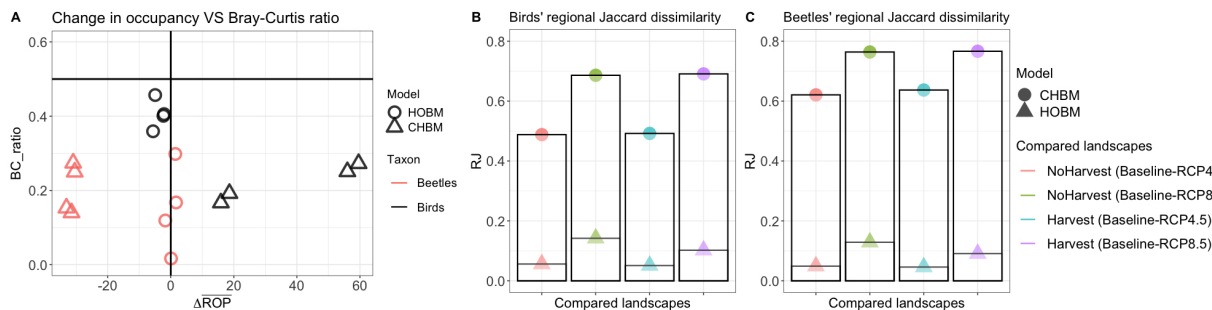

Figure 7: Regional dissimilarity and change in occupancy. **A.** the Bray-Curtis ratio ( $BC\_ratio$ ) with the percentage of change in the regional occupancy probability ( $\Delta\overline{ROP}$ ) under the four compared landscapes. **B-C.** Bird and Beetle Jaccard dissimilarity measures. Abbreviations: Climate-Habitat-Based Model (**CHBM**), Habitat-Only-Based Model (**HOBM**).

### 304 3.1 Occurrence and regional occupancy

305 The analysis of the occurrence and occupancy helped us to evaluate the direction and magnitude of potential  
 306 community changes following global change. The difference between the indirect and mixed climate effects  
 307 was visualized through  $\Delta\overline{ROP}_{Sim,Ref}$  (Fig. 7A). The magnitude of changes in occupancy compared to the  
 308 baseline reference scenario was larger when we included the climate variables (CHBMs) when compared to  
 309 the models including only habitat variables (HOBMs). The change in occupancy was observed mostly for  
 310 birds under HOBMs (the indirect effects) with a decrease in occupancy by comparing the climate change  
 311 scenarios to the baseline. Under CHBMs, we observed that occupancy increased for birds but decreased  
 312 for beetles when comparing the same radiative-forcing scenarios (RCP4.5 and RCP8.5) to the baseline (the  
 313 projection maps also demonstrated this result; compare Fig. 8E to Fig. 8F and Fig. 8A to Fig. 8B).  
 314 However, we observed a decrease in the percentage of winner species with climate change for the two taxa,  
 315 except for birds under HOBMs with no harvest (Fig. 11; see Fig. S11 for examples of responses of five



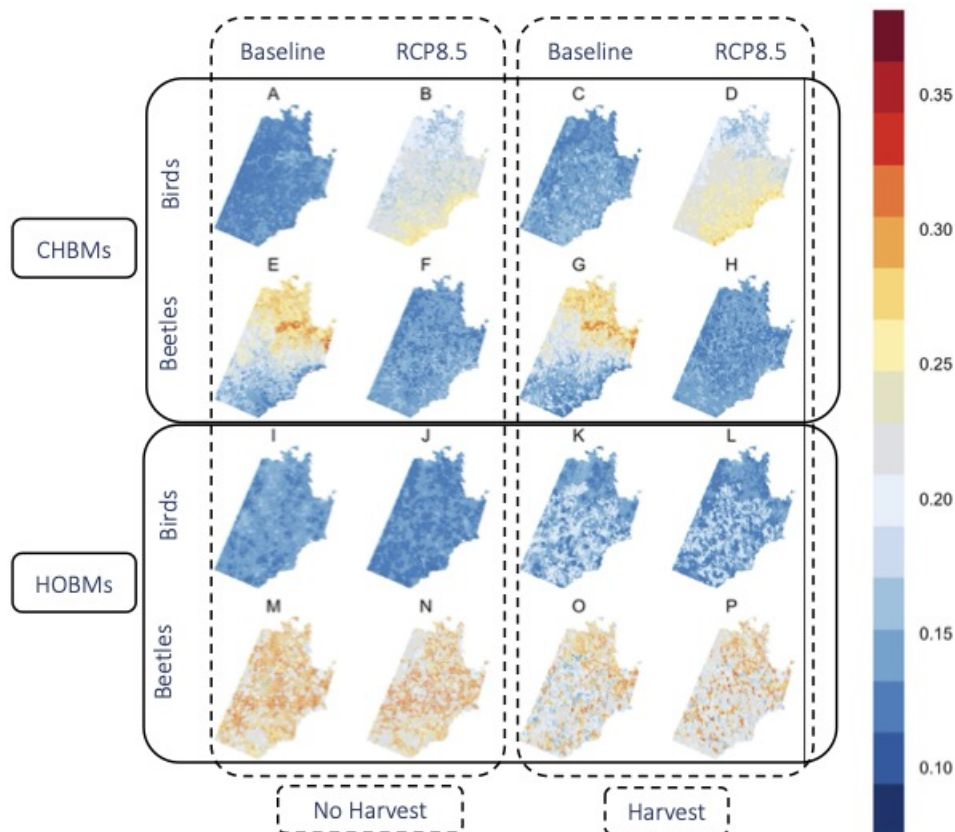

Figure 8: The average potential occurrence maps for each taxon based on four scenarios: BaselineNoHarvest (A, E, I, M), RCP8.5NoHarvest (B, F, J, N), BaselineHarvest (C, G, K, O) and RCP8.5Harvest (D, H, J, P) under the two model classes (CHBMs and HOBMs).

316 variable classes on eight winner and loser species).

### 317 3.2 Regional species assemblage change

318 An increase in assemblage dissimilarity was observed when comparing RCP4.5 and RCP8.5 to the baseline  
 319 for both taxa. Based on CHBMs, regional dissimilarity from RCP4.5 to RCP8.5 increased respectively  
 320 by 0.20 and 0.14 for birds and beetles under no harvest (Fig. 7B-C). Also, based on HOBMs, regional  
 321 dissimilarity from RCP4.5 to RCP8.5 increased respectively by 0.07 and 0.08 for birds and beetles under no  
 322 harvest. This regional dissimilarity was mainly incurred through balanced variation in species occupancy  
 323 for both taxa ( $BC\_ratio < 0.5$ ) (see Fig. 7A).

324

325 We also observed an increase in assemblage dissimilarity from HOBMs to CHBMs for both taxa. Inclusion  
 326 of the climate variables reshaped assemblage structure strongly under the two forest management levels (see  
 327 differences in the Jaccard dissimilarity index between HOBMs and CHBMs, Fig. 7B-C).

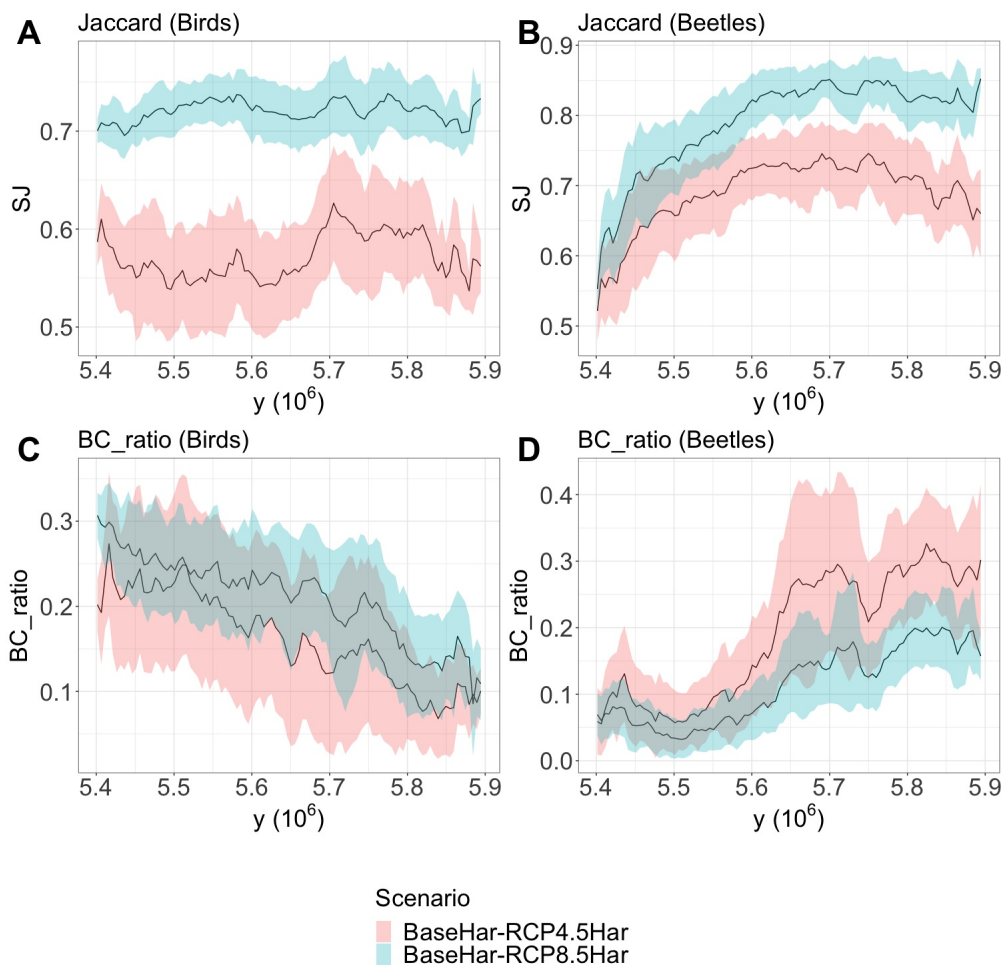

Figure 9: Spatial analysis. **A-B.** Latitudinal variation of spatial Jaccard dissimilarity of **RCP4.5Harvest** and **RCP8.5Harvest** compared to reference scenario **BaselineHarvest**. **C-D.** Latitudinal variation of spatial *BC\_ratio*. The shaded areas represented the standard deviation.

### 328 3.3 The latitudinal change in species assemblage

329 The inclusion of climate variables produced a latitudinal gradient in projections of assemblage dissimilarity.  
330 We used CHBMs to analyze how latitudinal changes in temperature and other climate variables would  
331 affect assemblage structure. A clear increasing pattern was observed in assemblage dissimilarity heading  
332 north, especially for beetle species. For birds, a slight increase in dissimilarity was observed, compared to  
333 that of beetles (see the difference between Fig. 9A and Fig. 9B).

334

335 Our models predict that beetles would show greater sensitivity to climate variations, given that an increase  
336 in dissimilarity was observed even for a medium level of climate change, i.e., RCP 4.5 following changes in  
337 temperature between the baseline and the two forcing scenarios. In Figs 10A-B, we depicted spatial change in

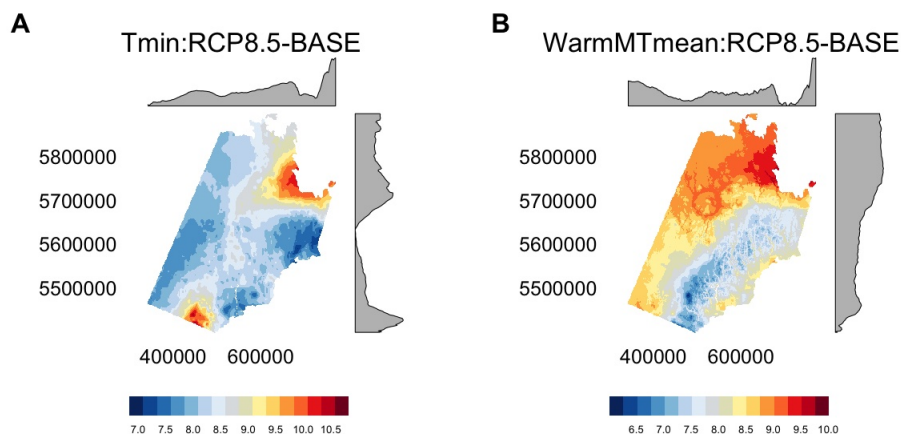

Figure 10: Temperature difference maps between RCP8.5 and baseline of annual minimum temperature (A) and mean temperature of the warmest month (B). Map scale: The dark red and the dark blue represented respectively the highest and the lowest values.

338 *Tmin* and *WarmMTmean* between RCP8.5 and baseline climate scenarios. *Tmin* and *WarmMTmean* were  
339 the most frequently selected respective predictor variables for birds and beetles (see Fig. 6A for the selection  
340 percentage). Furthermore, the observed latitudinal dissimilarity gradient was derived mainly from balanced  
341 variation in occurrence ( $BC\_ratio < 0.5$  in Figs. 9C-D). Yet, the two taxa behaved in a contrasting manner  
342 regarding their latitudinal variation in the occurrence gradient component of *BC* dissimilarity.

## 343 4 Discussion

344 The present study shows effects of two climate-induced pathways on animal species assemblages: (1) indi-  
345 rectly (i.e., through forest changes); and (2) by combining the immediate response from climate variables  
346 with the indirect effects (i.e., mixed effects). This contributes to our understanding of complex responses of  
347 animals occupancy and community compositional changes following immediate and lagged climate change  
348 effects. We showed that the two climate-induced pathways that were studied acted on species assemblage  
349 turnover. Immediate effects that were expressed through the change in climate conditions apparently strongly  
350 modified the assemblage composition more than did the lagged effects. In fact, the difference in magnitude  
351 between the two effects was due to the mismatch that was generated by rapid climate variation compared  
352 to slower vegetation change (Wu et al., 2015; Stralberg et al., 2015; Micheletti et al., 2021). Regionally,  
353 both climate effects acted on the decrease in number of winner species and on the increase in assemblage  
354 dissimilarity by ordered comparison of RCP 4.5 through RCP 8.5 to the baseline scenario. Dissimilarity was  
355 caused principally by balanced variation in species occupancy, which is considered to be a generalization of  
356 turnover for continuous outputs (Baselga, 2013). However, we observed almost an opposite feedback between

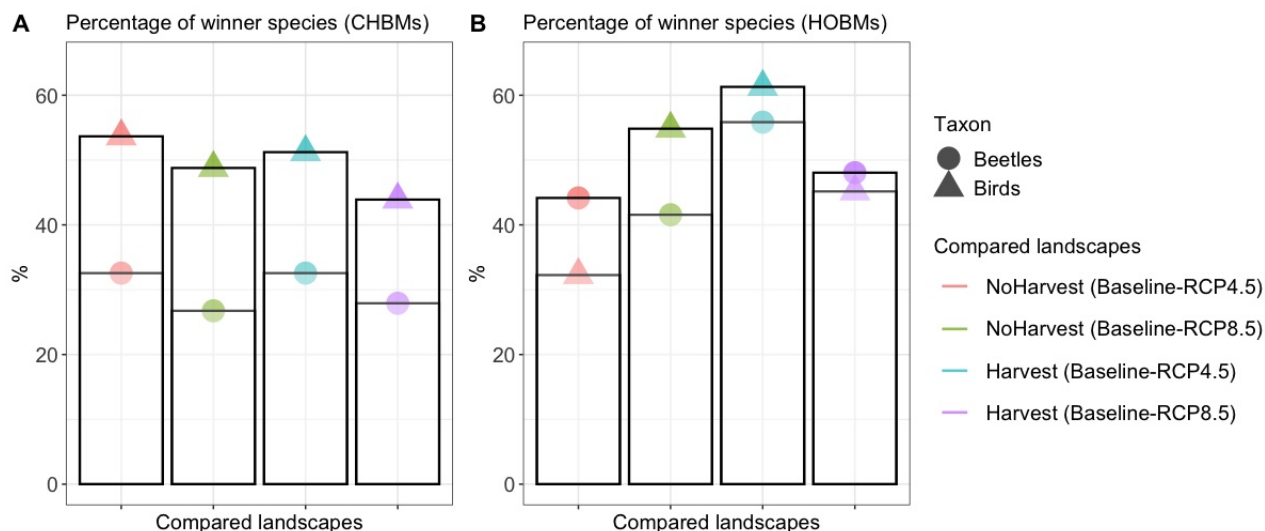

Figure 11: Percentage of winner species per taxon under the four landscapes that were compared and the two model classes (CHBMs and HOBMs). Species  $i$  was considered as winner if the regional occupancy probability under the simulated scenario was higher than under the reference scenario ( $ROP_{Sim,i} > ROP_{Ref,i}$ ).

357 the two taxa regarding changes in the regional occupancy.

#### 358 4.1 The implications on species assemblages and occupancy

359 The response of beetles and birds to climate change was predicted to be complex. We highlighted climate  
360 change projections that would likely cause pronounced variation in assemblage composition for the two study  
361 taxa by 2100 under the two harvest levels following two climate pathways. We observed a decrease in the  
362 number of winner species with increasing anthropogenic radiative forcing, i.e., between RCP4.5 and RCP8.5  
363 (Fig. 11) under nearly all scenarios and model classes for the two taxa (except under No harvest using  
364 HOBMs for birds, Fig. 11B) (Pizzolotto et al., 2014). Moreover, the observed change in assemblage dis-  
365 similarity was mainly caused by balanced variation in occupancy for the two taxa under the two model classes.

366  
367 We projected substantial differences in future biodiversity patterns, when comparing habitat-based  
368 models with those that also included climate variables. On one hand, from a habitat-based perspective  
369 (indirect effects), we observed an increase in assemblage dissimilarity by increasing anthropogenic radiative  
370 forcing compared to that of the baseline. On the other hand, we observed a slight negative effect on  
371 regional occupancy especially for birds based on the indirect effect. Yet, we estimated that only 45.2% of  
372 bird species and 48.1% of beetle species, under harvest increased their occupancy from baseline to RCP8.5  
373 (Fig. 11B). From a climate-habitat perspective, the impact of mixed effects on biodiversity was observed to  
374 be very different compared to the indirect habitat-based effects in terms of direction and magnitude. The

375 inclusion of immediate climate effects strongly affected the turnover of biodiversity. For instance, regional  
376 dissimilarity with baseline conditions increased from 0.49 to 0.69 for birds and from 0.62 to 0.76 for beetles  
377 under RCP 4.5 and RCP 8.5, respectively. Moreover, the increase in bird occupancy as a result of the mixed  
378 combination between direct and indirect climate effects coincided globally with the *northern biodiversity*  
379 *paradox* that was emphasized by Matthews et al. (2004), Morin and Thuiller (2009), and Berteaux et al.  
380 (2010), which anticipated an increase in biodiversity in northern protected areas this century. For beetles,  
381 we observed a substantial decrease in regional occupancy following an increase in global warming. This  
382 outcome aligned with the global scale biodiversity trajectory predicting mostly negative effects of high  
383 emissions on biodiversity and ecosystem services (Pachauri et al., 2014). Despite the observed increase in  
384 regional occupancy for birds, the percentage of winner species decreased with climate change for the two  
385 taxa (Fig. 11A). In addition, we found that indirect effects, through climate-induced changes in habitat  
386 only, were smaller in magnitude compared to the combined indirect and direct effects for both taxa. This  
387 conclusion can be explained by the mismatch between the climate and the biota (Stralberg et al., 2015; Wu  
388 et al., 2015; Micheletti et al., 2021). For example, Brice et al. (2020) noted that under climate change the  
389 variation in climate conditions would be faster than the capacity of tree species to migrate, which creates a  
390 gap between the climatic niche and the observed distribution of species.

391

392 Moreover, differences were observed between birds and beetles regarding indirect habitat-based and mixed  
393 effects. Beetles are poikilotherms, the internal temperature of which varies according to the temperature of  
394 the environment, while birds are homeotherms, the internal temperature of which is physiologically regulated.  
395 Our results suggest the potential presence of cold-habitat beetle species in the north. With increasing  
396 radiative forcing (Fig. 8F), their occurrence probability decreases as climate conditions extend beyond their  
397 tolerance limits. This could explain the different global implications of direct climate change on beetles and  
398 birds. We can expect, therefore, a decrease in the probability of occurrence for beetles in the future, and  
399 an increase in bird occurrence in our study area. Our conclusions accord with those of other studies based  
400 on limitations to phenotypic plasticity and evolvability of critical thermal tolerances for insects (Gaston and  
401 Chown, 1999; Terblanche et al., 2007; García-Robledo et al., 2016). For instance, (García-Robledo et al.,  
402 2016) had shown the role of critical thermal temperature on insects tolerance to global warming in context  
403 of elevation, which was used as a proxy for latitude in context of global warming. The authors demonstrated  
404 that insects that were found at middle elevations and on mountain tops were less tolerant to temperature  
405 increases than were species that were restricted.

## 406 4.2 The latitudinal biodiversity drivers

407 For species occupying the study area and under mixed climate effects, we observed substantial changes  
408 in biodiversity with latitude with increasing radiative forcing, with almost complete replacement of the  
409 assemblage in the northern portion of the study area for beetles. This latitudinal pattern was different from  
410 Brice et al. (2019) where a northward decrease in temporal  $\beta$ -diversity was observed for tree species between  
411 past (1970-1980) and present (2000-2016) periods. Our results may reflect the potential implications of direct  
412 climate effects when the situation becomes more severe, particularly for insects. This latitudinal gradient  
413 could be a result of the polar amplification that was characterized by an increase in temperature anomalies  
414 near to the pole in response to a change in global climate forcing (Holland and Bitz, 2003). However since  
415 the studied latitudinal range was relatively small, so the climatic envelope that was used for calibration could  
416 also have an impact on this trend.

## 417 4.3 Conclusion

418 In conclusion, based on implicit assumptions of individual species responses to climate change, our analyses  
419 identified potential repercussions of two climate-induced pathways which were based on immediate and  
420 lagged climate change, on the assemblage composition of two taxonomic groups regionally and latitudinally.  
421 We showed alteration in biodiversity both regionally and latitudinally following climate change that was  
422 derived mainly from balanced variation in species occupancy and occurrence. Moreover, we emphasized the  
423 importance of climatic variables in models to predict the occurrence of insects (beetles in our case) and  
424 birds that was distinguishable through the observed latitudinal gradient in assemblage dissimilarity. Finally,  
425 different responses between the study taxa were observed under the two climate-induced pathways, which  
426 could indicate the potential range of change for boreal species in relation to novel environmental conditions.

## 427 Acknowledgements

428 This work was supported by the Sentinel North program of Laval University, funded by the Canada First  
429 Research Excellence Fund. A.A., D.F., C.H., and P.D. were also supported by The Natural Sciences and  
430 Engineering Research Council of Canada (NSERC). We acknowledge Calcul Québec and Compute Canada  
431 for their technical support and computing infrastructures. We thank also the Québec Breeding Bird Atlas  
432 for supplying data. We would also like to thank the following partners: Regroupement QuébecOiseaux,  
433 Environment and Climate Change Canada and Birds Canada, as well as all of the volunteer participants  
434 who gathered data for the project. We are grateful to Louis-Paul Rivest for his valuable statistical suggestions



435 and advice. Special thanks are due to Alexandre Terrigeol for his valuable efforts regarding data collection,  
436 Georges Pelletier and Nicolas Bédard for beetle identification and to W.F.J. Parsons for his English revision.

## 437 References

438 Albouy, C., Guilhaumon, F., Araújo, M. B., Mouillot, D., and Leprieur, F. (2012). Combining projected  
439 changes in species richness and composition reveals climate change impacts on coastal Mediterranean fish  
440 assemblages. *Global Change Biology*, 18(10):2995–3003.

441 Allouche, O., Tsoar, A., and Kadmon, R. (2006). Assessing the accuracy of species distribution models:  
442 prevalence, kappa and the true skill statistic (tss). *Journal of Applied Ecology*, 43(6):1223–1232.

443 Araújo, M. B., Pearson, R. G., Thuiller, W., and Erhard, M. (2005). Validation of species–climate impact  
444 models under climate change. *Global Change Biology*, 11(9):1504–1513.

445 Atlas des oiseaux nicheurs du Québec (2018). Données obtenues en réponse à une demande présentée aux  
446 bureaux de l’Atlas ([www.atlas-oiseaux.qc.ca](http://www.atlas-oiseaux.qc.ca)). Regroupement QuébecOiseaux, Service canadien de la faune  
447 d’Environnement Canada et Études d’Oiseaux Canada. Québec, Québec, Canada.

448 Ballings, M. and Van den Poel, D. (2013). Package ‘AUC’. [https://cran.r-project.org/web/packages/  
449 AUC.](https://cran.r-project.org/web/packages/AUC/)

450 Barton, A. D., Irwin, A. J., Finkel, Z. V., and Stock, C. A. (2016). Anthropogenic climate change drives  
451 shift and shuffle in North Atlantic phytoplankton communities. *Proceedings of the National Academy of  
452 Sciences of the United States of America*, 113(11):2964–2969.

453 Barton, K. (2015). Package ‘MuMIn’. [https://cran.r-project.org/web/packages/MuMIn.](https://cran.r-project.org/web/packages/MuMIn/)

454 Baselga, A. (2010). Partitioning the turnover and nestedness components of beta diversity. *Global Ecology  
455 and Biogeography*, 19(1):134–143.

456 Baselga, A. (2013). Separating the two components of abundance-based dissimilarity: balanced changes in  
457 abundance vs. abundance gradients. *Methods in Ecology and Evolution*, 4(6):552–557.

458 Baselga, A. and Orme, C. D. L. (2012). betapart: an R package for the study of beta diversity. *Methods in  
459 ecology and evolution*, 3(5):808–812.

460 Bates, D., Mächler, M., Bolker, B., and Walker, S. (2015). Fitting linear mixed-effects models using lme4.  
461 [https://cran.r-project.org/web/packages/lme4.](https://cran.r-project.org/web/packages/lme4/)

- 462 Beaudoin, A., Bernier, P., Guindon, L., Villemaire, P., Guo, X., Stinson, G., Bergeron, T., Magnussen, S.,  
463 and Hall, R. (2014). Mapping attributes of Canada’s forests at moderate resolution through kNN and  
464 MODIS imagery. *Canadian Journal of Forest Research*, 44(5):521–532.
- 465 Belliard, J., Beslagic, S., Delaigue, O., and Tales, E. (2018). Reconstructing long-term trajectories of  
466 fish assemblages using historical data: the Seine River basin (France) during the last two centuries.  
467 *Environmental Science and Pollution Research*, 25(24):23430–23450.
- 468 Bentz, B. J., Rgnire, J., Fettig, C. J., Hansen, E. M., Hayes, J. L., Hicke, J. A., Kelsey, R. G., Negron, J. F.,  
469 and Seybold, S. J. (2010). Climate change and bark beetles of the western United States and Canada:  
470 Direct and indirect effects. *BioScience*, 60(8):602–613.
- 471 Berteaux, D., Blois, S. d., Angers, J.-F., Bonin, J., Casajus, N., Darveau, M., Fournier, F., Humphries,  
472 M. M., McGill, B., Larivée, J., et al. (2010). The CC-Bio Project: studying the effects of climate change  
473 on Quebec biodiversity. *Diversity*, 2(11):1181–1204.
- 474 Bibby, C. J., Burgess, N. D., Hill, D. A., Hillis, D. M., and Mustoe, S. (2000). *Bird census techniques*.  
475 Elsevier.
- 476 Bichet, O., Dupuch, A., Hébert, C., Le Borgne, H., and Fortin, D. (2016). Maintaining animal assemblages  
477 through single-species management: the case of threatened caribou in boreal forest. *Ecological Applications*,  
478 26(2):612–623.
- 479 Bouchard, M. and Pothier, D. (2011). Long-term influence of fire and harvesting on boreal forest age structure  
480 and forest composition in eastern québec. *Forest Ecology and Management*, 261(4):811–820.
- 481 Boucher, Y., Perrault-Hébert, M., Fournier, R., Drapeau, P., and Auger, I. (2017). Cumulative patterns  
482 of logging and fire (1940–2009): consequences on the structure of the eastern canadian boreal forest.  
483 *Landscape Ecology*, 32(2):361–375.
- 484 Boulanger, Y., Parisien, M.-A., and Wang, X. (2018a). Model-specification uncertainty in future area burned  
485 by wildfires in Canada. *International Journal of Wildland Fire*, 27(3):164–175.
- 486 Boulanger, Y. and Puigdevall, J. P. (2021). Boreal forests will be more severely affected by projected anthro-  
487 pogenic climate forcing than mixedwood and northern hardwood forests in eastern Canada. *Landscape*  
488 *Ecology*, 36(6):1725–1740.
- 489 Boulanger, Y., Taylor, A. R., Price, D. T., Cyr, D., McGarrigle, E., Rammer, W., Sainte-Marie, G., Beaudoin,  
490 A., Guindon, L., and Mansuy, N. (2017). Climate change impacts on forest landscapes along the Canadian  
491 southern boreal forest transition zone. *Landscape Ecology*, 32(7):1415–1431.

- 492 Boulanger, Y., Taylor, A. R., Price, D. T., Cyr, D., and Sainte-Marie, G. (2018b). Stand-level drivers most  
493 important in determining boreal forest response to climate change. *Journal of Ecology*, 106(3):977–990.
- 494 Brice, M.-H., Cazelles, K., Legendre, P., and Fortin, M.-J. (2019). Disturbances amplify tree commu-  
495 nity responses to climate change in the temperate–boreal ecotone. *Global Ecology and Biogeography*,  
496 28(11):1668–1681.
- 497 Brice, M.-H., Vissault, S., Vieira, W., Gravel, D., Legendre, P., and Fortin, M.-J. (2020). Moderate dis-  
498 turbances accelerate forest transition dynamics under climate change in the temperate–boreal ecotone of  
499 eastern North America. *Global Change Biology*, 26(8):4418–4435.
- 500 Bureau du Forestier en chef (2010). Bilan d’aménagement forestier durable au Québec 2000-2008. Gouverne-  
501 ment du Québec, Roberval, Québec, 290 p.
- 502 Bush, E. and Lemmen, D. S. (2019). Canada’s Changing Climate Report. Government of Canada, Ottawa,  
503 ON, Canada, 444 p. (Editors).
- 504 Cadieux, P., Boulanger, Y., Cyr, D., Taylor, A. R., Price, D. T., Sólymos, P., Stralberg, D., Chen, H. Y.,  
505 Brecka, A., and Tremblay, J. A. (2020). Projected effects of climate change on boreal bird community  
506 accentuated by anthropogenic disturbances in western boreal forest, Canada. *Diversity and Distributions*,  
507 26(6):668–682.
- 508 Dubuis, A., Pottier, J., Rion, V., Pellissier, L., Theurillat, J.-P., and Guisan, A. (2011). Predicting spatial  
509 patterns of plant species richness: a comparison of direct macroecological and species stacking modelling  
510 approaches. *Diversity and Distributions*, 17(6):1122–1131.
- 511 Duveneck, M. J., Scheller, R. M., White, M. A., Handler, S. D., and Ravenscroft, C. (2014). Climate change  
512 effects on northern Great Lake (USA) forests: A case for preserving diversity. *Ecosphere*, 5(2):art23.
- 513 Elith, J., Graham, C., Valavi, R., Abegg, M., Bruce, C., Ford, A., Guisan, A., Hijmans, R. J., Huettmann,  
514 F., Lohmann, L., et al. (2020). Presence-only and presence-absence data for comparing species distribution  
515 modeling methods. *Biodiversity Informatics*, 15(2):69–80.
- 516 Freeman, E. and Freeman, M. E. (2012). Package ‘PresenceAbsence’. [https://cran.r-project.org/web/  
517 packages/PresenceAbsence/](https://cran.r-project.org/web/packages/PresenceAbsence/).
- 518 García-Robledo, C., Kuprewicz, E. K., Staines, C. L., Erwin, T. L., and Kress, W. J. (2016). Limited  
519 tolerance by insects to high temperatures across tropical elevational gradients and the implications of

- 520 global warming for extinction. *Proceedings of the National Academy of Sciences of the United States of*  
521 *America*, 113(3):680–685.
- 522 Gaston, K. J. and Chown, S. L. (1999). Elevation and climatic tolerance: A test using dung beetles. *Oikos*,  
523 86(3):584–590.
- 524 Gelfand, A. E., Schmidt, A. M., Wu, S., Silander Jr, J. A., Latimer, A., and Rebelo, A. G. (2005). Modelling  
525 species diversity through species level hierarchical modelling. *Journal of the Royal Statistical Society:*  
526 *Series C (Applied Statistics)*, 54(1):1–20.
- 527 Girardin, M. P., Bouriaud, O., Hogg, E. H., Kurz, W., Zimmermann, N. E., Metsaranta, J. M., de Jong,  
528 R., Frank, D. C., Esper, J., Büntgen, U., Guo, X. J., and Bhatti, J. (2016). No growth stimulation of  
529 Canada’s boreal forest under half-century of combined warming and  $CO_2$  fertilization. *Proceedings of the*  
530 *National Academy of Sciences of the United States of America*, 113(52):E8406–E8414.
- 531 Grenié, M., Violle, C., and Munoz, F. (2020). Is prediction of species richness from stacked species distribution  
532 models biased by habitat saturation? *Ecological Indicators*, 111:105970.
- 533 Guisan, A. and Thuiller, W. (2005). Predicting species distribution: offering more than simple habitat  
534 models. *Ecology Letters*, 8(9):993–1009.
- 535 Guisan, A. and Zimmermann, N. E. (2000). Predictive habitat distribution models in ecology. *Ecological*  
536 *Modelling*, 135(2):147–186.
- 537 Hillebrand, H., Soininen, J., and Snoijs, P. (2010). Warming leads to higher species turnover in a coastal  
538 ecosystem. *Global Change Biology*, 16(4):1181–1193.
- 539 Holland, M. M. and Bitz, C. M. (2003). Polar amplification of climate change in coupled models. *Climate*  
540 *Dynamics*, 21(3):221–232.
- 541 Hosmer, D. W., Lemeshow, S., and Sturdivant, R. X. (2013). *Applied logistic regression*, volume 398. John  
542 Wiley & Sons.
- 543 Janssen, P., Fortin, D., and Hébert, C. (2009). Beetle diversity in a matrix of old-growth boreal forest:  
544 influence of habitat heterogeneity at multiple scales. *Ecography*, 32(3):423–432.
- 545 Kelly, A. E. and Goulden, M. L. (2008). Rapid shifts in plant distribution with recent climate change.  
546 *Proceedings of the National Academy of Sciences of the United States of America*, 105(33):11823–11826.
- 547 Kumar, P. (2013). Hydrology: Seasonal Rain Changes. *Nature Climate Change*, 3(9):783–784.

- 548 Labadie, G., Hardy, C., Boulanger, Y., Vanlandeghem, V., Hebblewhite, M., and Fortin, D. (2022). Global  
549 changes impact a threatened species through alteration of predator-prey dynamics. *To be submitted to*  
550 *Nature Climate Change*.
- 551 Labadie, G., McLoughlin, P. D., Hebblewhite, M., and Fortin, D. (2021). Insect-mediated apparent compe-  
552 tition between mammals in a boreal food web. *Proceedings of the National Academy of Sciences of the*  
553 *United States of America*, 118(30).
- 554 Légaré, J.-P., Hébert, C., and Ruel, J.-C. (2011). Alternative silvicultural practices in irregular boreal forests:  
555 Response of beetle assemblages. *Silva Fennica*, 45(5):937–956.
- 556 Legendre, P. (2014). Interpreting the replacement and richness difference components of beta diversity.  
557 *Global Ecology and Biogeography*, 23(11):1324–1334.
- 558 MacKenzie, D. I., Nichols, J. D., Royle, J. A., Pollock, K. H., Bailey, L., and Hines, J. E. (2017). *Occupancy*  
559 *estimation and modeling: inferring patterns and dynamics of species occurrence*. Elsevier.
- 560 Masson-Delmotte, V., Zhai, P., Pörtner, H.-O., Roberts, D., Skea, J., Shukla, P. R., et al. (2018). Global  
561 Warming of 1.5 °C. An IPCC Special Report on the impacts of global warming of 1.5 °C above pre-  
562 industrial levels and related global greenhouse gas emission pathways, in the context of strengthening the  
563 global response to the threat of climate change, sustainable development, and efforts to eradicate poverty.  
564 Technical report, IPCC.
- 565 Matthews, S., O’Connor, R., Iverson, L. R., and Prasad, A. M. (2004). Atlas of climate change effects  
566 in 150 bird species of the Eastern United States. Gen. Tech. Rep. NE-318. Newtown Square, PA: U.S.  
567 Department of Agriculture, Forest Service, Northeastern Research Station. 340 p.
- 568 McKenney, D., Pedlar, J., Hutchinson, M., Papadopol, P., Lawrence, K., Campbell, K., Milewska, E., Hop-  
569 kinson, R. F., and Price, D. (2013). Spatial climate models for Canada’s forestry community. 89(05):659–  
570 663.
- 571 Micheletti, T., Stewart, F. E. C., Cumming, S. G., Haché, S., Stralberg, D., Tremblay, J. A., Barros, C.,  
572 Eddy, I. M. S., Chubaty, A. M., Leblond, M., Pankratz, R. F., Mahon, C. L., Van Wilgenburg, S. L.,  
573 Bayne, E. M., Schmiegelow, F., and McIntire, E. J. B. (2021). Assessing pathways of climate change  
574 effects in SpaDES: An application to bBoreal Landbirds of Northwest Territories Canada. *Frontiers in*  
575 *Ecology and Evolution*, 9(October).

- 576 Ministère des Forêts de la Faune et des Parcs (2018). Aires infestées par la tordeuse des bourgeons de  
577 l'épinette au québec en 2018, 20 p. Technical report, Québec, gouvernement du Québec, Direction de la  
578 protection des forêts.
- 579 Morin, X. and Thuiller, W. (2009). Comparing niche-and process-based models to reduce prediction uncer-  
580 tainty in species range shifts under climate change. *Ecology*, 90(5):1301–1313.
- 581 Pachauri, R. K., Allen, M. R., Barros, V. R., Broome, J., Cramer, W., Christ, R., Church, J. A., Clarke,  
582 L., Dahe, Q., Dasgupta, P., et al. (2014). *Climate change 2014: synthesis report. Contribution of Working*  
583 *Groups I, II and III to the fifth assessment report of the Intergovernmental Panel on Climate Change*.  
584 IPCC, Gland, Switzerland.
- 585 Peterson, A. T., Soberón, J., Pearson, R. G., Anderson, R. P., Martínez-Meyer, E., Nakamura, M., and  
586 Araújo, M. B. (2011). *Ecological niches and geographic distributions (MPB-49)*, volume 49. Princeton  
587 University Press.
- 588 Pizzolotto, R., Gobbi, M., and Brandmayr, P. (2014). Changes in ground beetle assemblages above and below  
589 the treeline of the Dolomites after almost 30 years (1980/2009). *Ecology and Evolution*, 4(8):1284–1294.
- 590 Pureswaran, D. S., De Grandpré, L., Paré, D., Taylor, A., Barrette, M., Morin, H., Régnière, J., and  
591 Kneeshaw, D. D. (2015). Climate-induced changes in host tree–insect phenology may drive ecological  
592 state-shift in boreal forests. *Ecology*, 96(6):1480–1491.
- 593 Régnière, J., Saint-Amant, R., Béchard, A., and Moutaoufik, A. (2017). BioSIM 11: User’s manual. Technical  
594 report, Natural Resources Canada, Canadian Forest Service, Laurentian Forestry Centre, Québec, QC  
595 Canada.
- 596 Scheller, R. M. and Mladenoff, D. J. (2004). A forest growth and biomass module for a landscape simulation  
597 model, LANDIS: design, validation, and application. *Ecological Modelling*, 180(1):211–229. Modelling  
598 disturbance and succession in forest landscapes using LANDIS.
- 599 Scherrer, D., Mod, H. K., and Guisan, A. (2020). How to evaluate community predictions without thresh-  
600 olding? *Methods in Ecology and Evolution*, 11(1):51–63.
- 601 Stralberg, D., Bayne, E. M., Cumming, S. G., Sólymos, P., Song, S. J., and Schmiegelow, F. K. (2015).  
602 Conservation of future boreal forest bird communities considering lags in vegetation response to climate  
603 change: A modified refugia approach. *Diversity and Distributions*, 21(9):1112–1128.



- 604 Taylor, A. R., Boulanger, Y., Price, D. T., Cyr, D., McGarrigle, E., Rammer, W., and Kershaw, J. A. (2017).  
605 Rapid 21st century climate change projected to shift composition and growth of Canada's Acadian Forest  
606 Region. *Forest Ecology and Management*, 405:284–294.
- 607 Terblanche, J. S., Deere, J. A., Clusella-Trullas, S., Janion, C., and Chown, S. L. (2007). Critical ther-  
608 mal limits depend on methodological context. *Proceedings of the Royal Society B: Biological Sciences*,  
609 274(1628):2935–2943.
- 610 Thuiller, W., Guéguen, M., Bison, M., Duparc, A., Garel, M., Loison, A., Renaud, J., and Poggiato, G.  
611 (2018). Combining point-process and landscape vegetation models to predict large herbivore distributions  
612 in space and time— A case study of *Rupicapra rupicapra*. *Diversity and Distributions*, 24(3):352–362.
- 613 Thuiller, W., Lavergne, S., Roquet, C., Boulangeat, I., Lafourcade, B., and Araujo, M. B. (2011). Conse-  
614 quences of climate change on the tree of life in Europe. *Nature*, 470(7335):531–534.
- 615 Tremblay, J. A., Boulanger, Y., Cyr, D., Taylor, A. R., Price, D. T., and St-Laurent, M.-H. (2018). Harvesting  
616 interacts with climate change to affect future habitat quality of a focal species in eastern Canada's boreal  
617 forest. *PLOS ONE*, 13(2):1–25.
- 618 van Vuuren, D. P., Edmonds, J., Kainuma, M., Riahi, K., Thomson, A., Hibbard, K., Hurtt, G. C., Kram,  
619 T., Krey, V., Lamarque, J.-F., Masui, T., Meinshausen, M., Nakicenovic, N., Smith, S. J., and Rose, S. K.  
620 (2011). The representative concentration pathways: an overview. *Climatic Change*, 109(1):5.
- 621 Wisz, M. S., Pottier, J., Kissling, W. D., Pellissier, L., Lenoir, J., Damgaard, C. F., Dormann, C. F.,  
622 Forchhammer, M. C., Grytnes, J.-A., Guisan, A., Heikkinen, R. K., Høye, T. T., Kühn, I., Luoto, M.,  
623 Maiorano, L., Nilsson, M.-C., Normand, S., Öckinger, E., Schmidt, N. M., Termansen, M., Timmermann,  
624 A., Wardle, D. A., Aastrup, P., and Svenning, J.-C. (2013). The role of biotic interactions in shaping  
625 distributions and realised assemblages of species: implications for species distribution modelling. *Biological*  
626 *Reviews*, 88(1):15–30.
- 627 Wu, D., Zhao, X., Liang, S., Zhou, T., Huang, K., Tang, B., and Zhao, W. (2015). Time-lag effects of global  
628 vegetation responses to climate change. *Global Change Biology*, 21(9):3520–3531.
- 629 Zhang, Y. and Liang, S. (2014). Changes in forest biomass and linkage to climate and forest disturbances  
630 over northeastern china. *Global Change Biology*, 20(8):2596–2606.
- 631 Zhao, Q., Azeria, E. T., Le Blanc, M.-L., Lemaître, J., and Fortin, D. (2013). Landscape-scale disturbances  
632 modified bird community dynamics in successional forest environment. *PLOS ONE*, 8(11):1–11.

- 633 Zurell, D., Zimmermann, N. E., Gross, H., Baltensweiler, A., Sattler, T., and Wüest, R. O. (2020). Testing  
634 species assemblage predictions from stacked and joint species distribution models. *Journal of Biogeography*,  
635 47(1):101–113.
